# Supplementary material for: Surface imprinting of a g-C3N4 photocatalyst for enhanced photocatalytic activity and selectivity towards photodegradation of 2-mercaptobenzothiazole
Source: Royal Society of Chemistry journal article supplement (doi:10.1039/c5ra06209h), 2015-01-01
Supplement: c5ra06209h1.pdf [file c5ra06209h1.pdf]

## Supporting Information

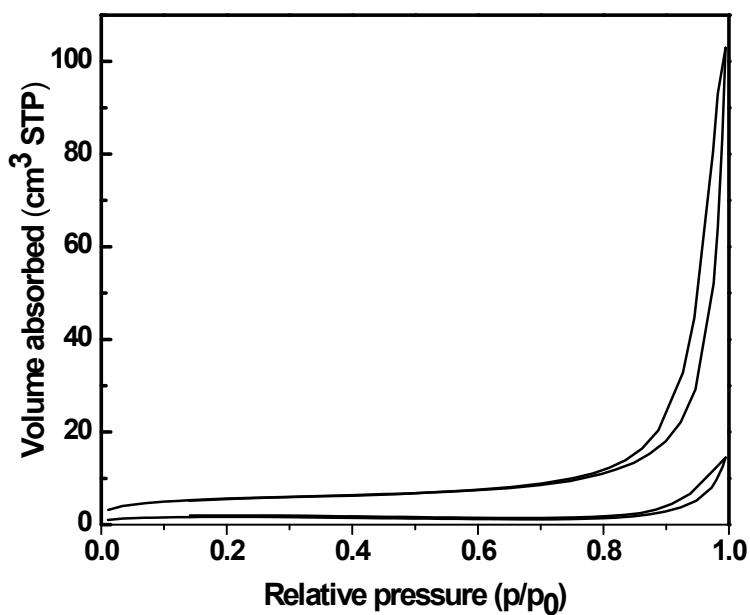

Fig. S1 Nitrogen sorption isotherms of g-C<sub>3</sub>N<sub>4</sub>(a) and MCIPs (b) calculated from desorption branch by BJH method.

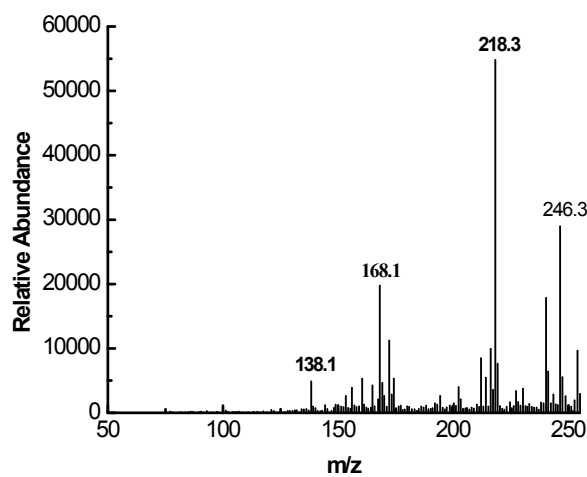

a

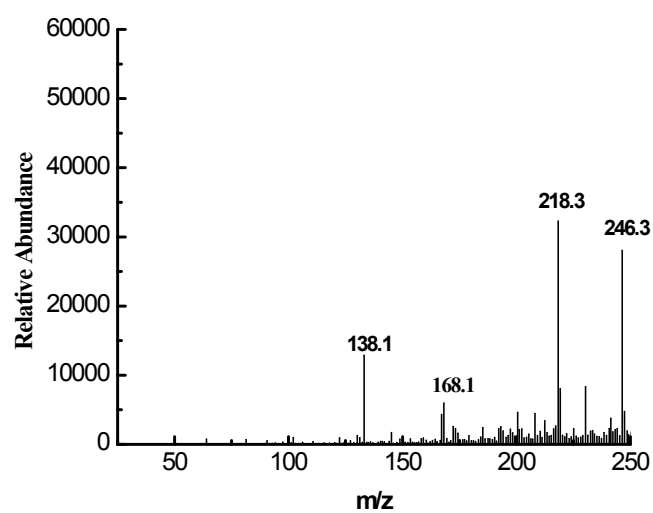

b

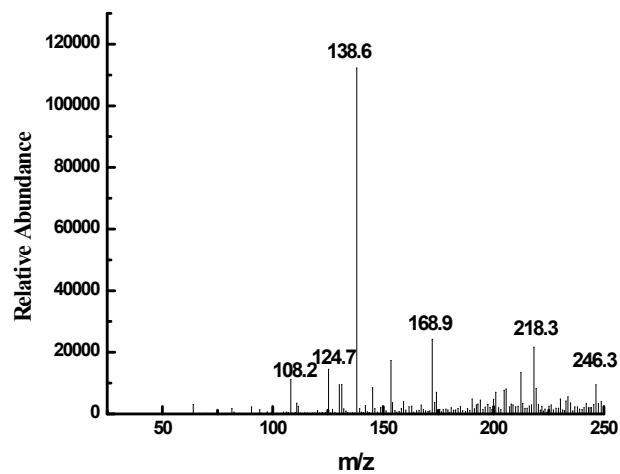

c

Fig. S2 Mass spectra of 2-Mercaptobenzothiazole in photodegradation process  
(a. 20 mg/L 2-Mercaptobenzothiazole, b. degradation for 40 min, c. degradation for  
60 min)
